# Supplementary material for: RNA-Seq Analysis Reveals an Essential Role of the cGMP-PKG-MAPK Pathways in Retinal Degeneration Caused by Cep250 Deficiency
Source: MDPI journal article supplement (doi:10.3390/ijms24108843), 2023-05-16
Supplement: s1 [file s1]

Table S1. Primer pairs used for qRT-PCR.

| Gene   | Primers                                                        |
|--------|----------------------------------------------------------------|
| Cep250 | 5'-GATGGCCGAGAATCAGGCTG-3'<br>5'-CCAGTGGCTTCTAGTCGCTT-3'       |
| Pde3a  | 5'-GGACTAGCGTGCTTAGGACG-3'<br>5'-GTATGCCAGGTAAGGTCTCCA-3'      |
| Pde3b  | 5'-AAAGCGCAGCCGGTTACTAT-3'<br>5'-CCATATTGCGAGCTTCATTTAGC-3'    |
| Pde6b  | 5'-GATCCAAGACAGTCCTCTCCAAG-3'<br>5'-GACCACACGAAAGGAGATAGTCA-3' |
| Parp1  | 5'-GTGACTTTTTAGCGGAGTACGC-3'<br>5'-CCAGCGGTCAATCATACCCAG-3'    |
| Fgf2   | 5'-GCAAAAACGGGGGCTTCTTC-3'<br>5'-AACGGTTAGCACACACTCCT-3'       |
| Edn2   | 5'-GTGGTCGCCCCAAGCA-3'<br>5'-TCCACATCTTGCCAGTCTTTAACA-3'       |
| Gfap   | 5'-TCTCGAATGACTCCTCCACTC-3'<br>5'-AAGCTCCGCCTGGTAGACAT-3'      |
| Tyr    | 5'-CAAAGGGGTGGATGACCGTG-3'<br>5'-AACTTACAGTTTCCGCAGTTGA-3'     |
| Gapdh  | 5'-AGGTCGGTGTGAACGGATTTG-3'<br>5'-TGTAGACCATGTAGTTGAGGTCA-3'   |
