# Supplementary material for: RNA-Seq Analysis Reveals an Essential Role of the cGMP-PKG-MAPK Pathways in Retinal Degeneration Caused by Cep250 Deficiency
Source: MDPI journal article supplement (doi:10.3390/ijms24108843), 2023-05-16
Supplement: s1 [file s1]

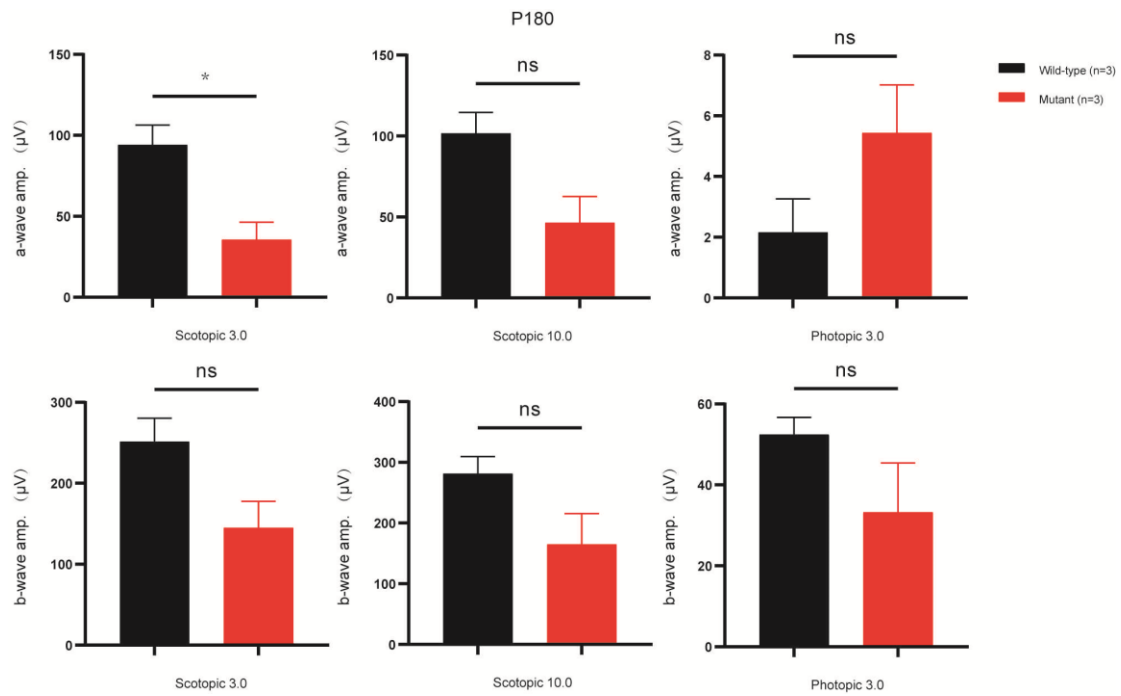

**Supplementary Figure S1.** Retinal function of Cep250 KO and WT mice at P180 determined by ERG. Statistical analysis of a-wave and b-wave amplitudes. \*P < 0.05, ns = no significance. Student's t-test.

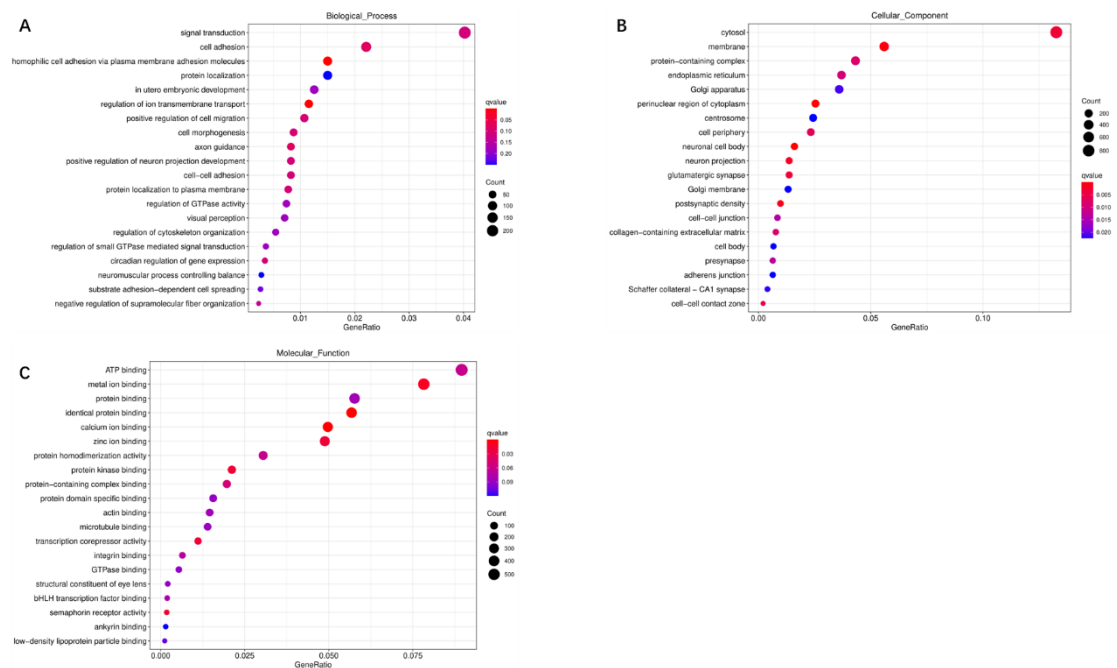

**Supplementary Figure S2.** GO enrichment analysis of the DEGs from Cep250 KO retinas compared to WT retina. (A) involved in Biological\_Process (BP) of GO enrichment. (B) involved in Cellular\_Component (CC) of GO enrichment. (C) involved in Molecular\_Function (MF) of GO enrichment.

**A**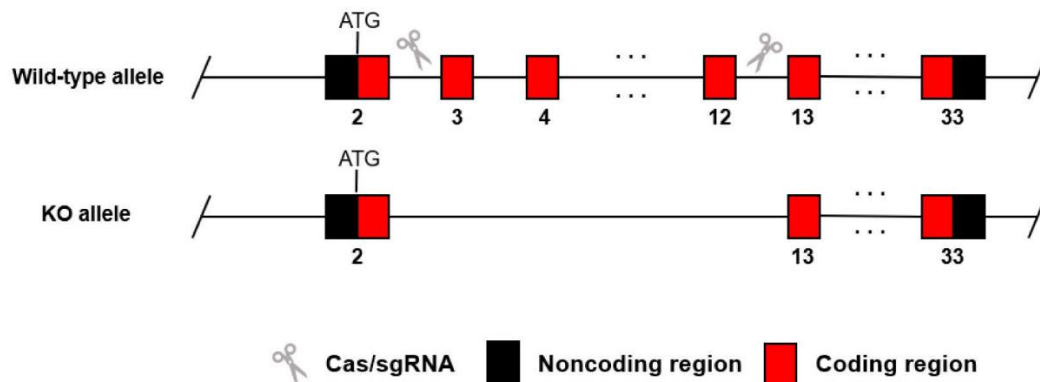**B**

| PCR number | Primer name | Primer sequences         | PCR products                 |
|------------|-------------|--------------------------|------------------------------|
| 1. KO      | Cep250-KO-F | CGTGTAGTACCAAACATCCTGGTG | WT:9380bp<br>Targeted:~799bp |
|            | Cep250-KO-R | AAGCCAAAATCTACAGCAACCCTC |                              |
| 2. WT      | Cep250-WT-F | CCCAACCTGGAACAGTTGCTGA   | WT:438bp<br>Targeted:0bp     |
|            | Cep250-WT-R | GCAAGGCTTTATTACACCATCG   |                              |

**C**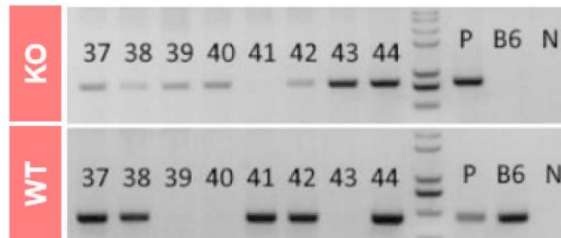

Genotyping results: Mutant: 39, 40, 43 Wild-type: 41

**D**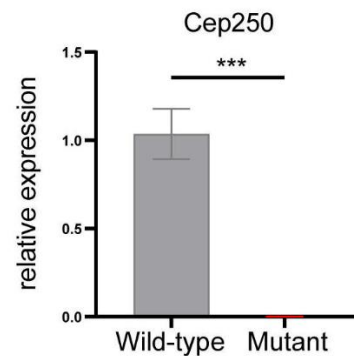

**Supplementary Figure S3.** Generation of Cep250 KO mice. (A) Cep250 KO mice were generated in a C57BL/6J background using the CRISPR/Cas9 system. (B-C) The Genotyping primers and example genotyping results of Cep250 KO mice and Wild-type mice. (D) RT-PCR analysis of Cep250 KO mice and Wild-type mice. \*\*\* $P < 0.001$ , Student's t-test.
